# Supplementary material
Source: Springer Nature journal article supplement (https://www.springermedizin.de/resource/supplementary/12889_2010_2652_MOESM3_ESM.pdf/9486890)

*context: urban setting  
allows for easy  
communication between  
members*

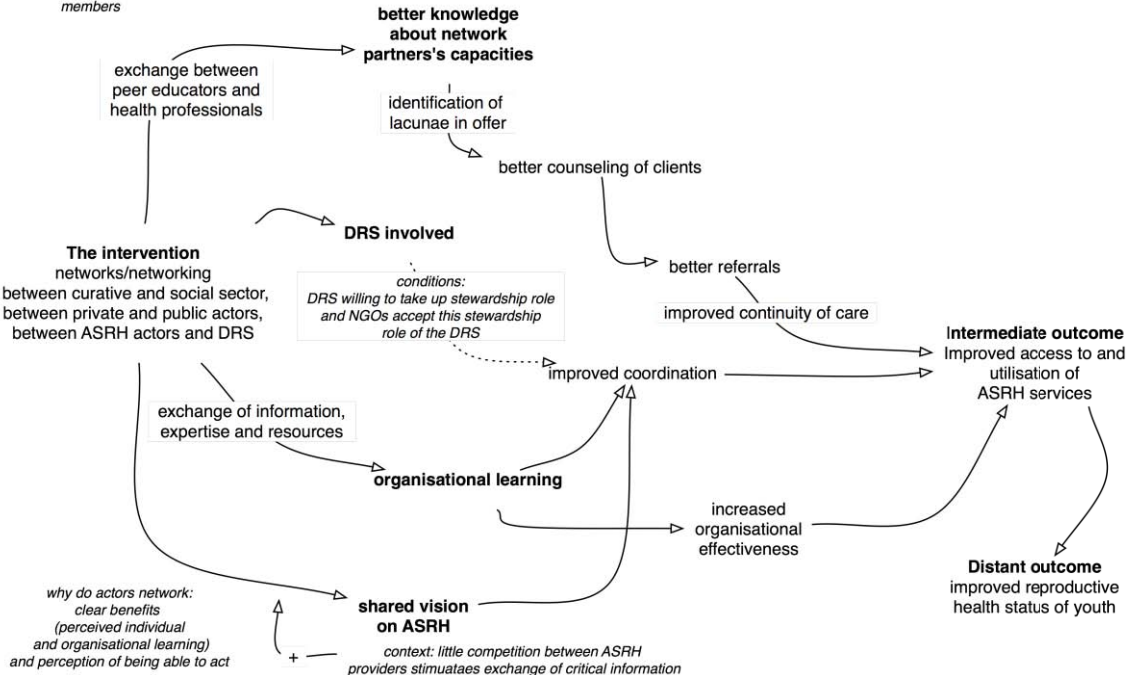

Supplement: MOESM3 [file 9486890]
